# Supplementary material for: Quantification of Tumour Angiogenesis and Perfusion using Contrast-free Super-Resolution Ultrasound Imaging
Source: Research Square preprint supplement (doi:10.21203/rs.3.rs-6829687/v1), 2025-06-30
Supplement: Supplementary file 1 [file 09b433609d6273cd33f67a13.pdf]

# Contrast-Free Quantification of Tumour Angiogenesis and Perfusion using SURE (Super-Resolution Ultrasound Using Erythrocytes).

## Supplementary Materials

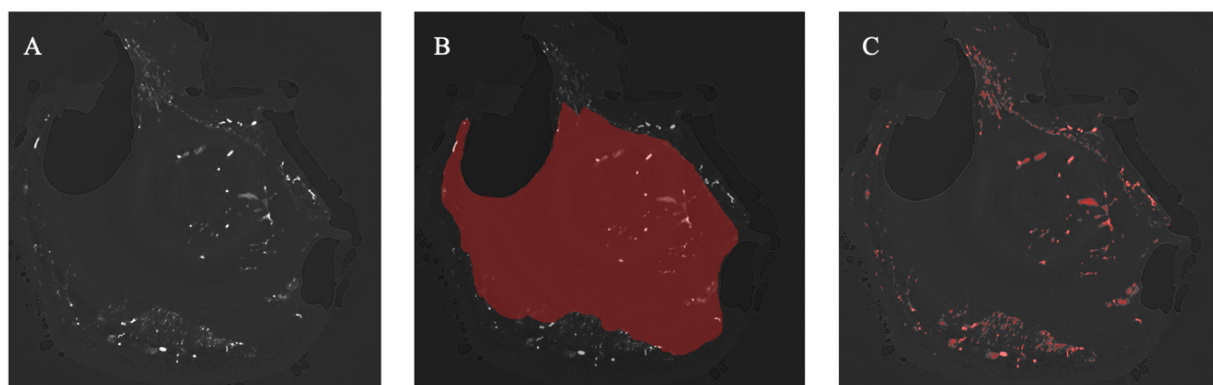

**Supplementary Figure 1: Tumour vascular density measurement from  $\mu$ CT scans.** All image planes display the same  $\mu$ CT image frame. Figure 2a:  $\mu$ CT scan without an overlay. Figure 2b: An overlay in red of the manually created 3-dimensional tumour ROI mask. Figure 2c: An overlay in red of the isolated vascular contrast agent using imaging intensity thresholding. All images are generated using ITK-SNAP software.

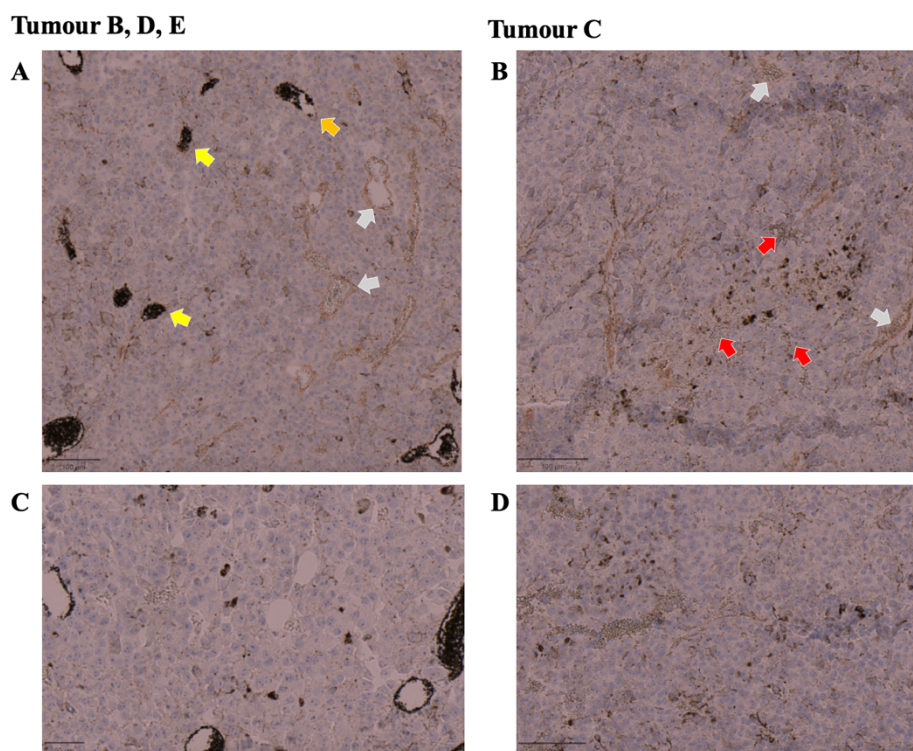

**Supplementary Figure 2: Variable contrast-agent vascular of tumours.** Figure 2a: a representative section of chromogenic CD-31-stained tissue section from tumours B, D and E, where some vessels were fully filled (yellow arrow), partially filled (orange arrow) or unfilled (grey arrow). Figure 2b: A representative region of Tumour C showing unfilled vessels (grey arrow) and extravasated erythrocytes (red arrow). Bottom row: matching negatively stained slides. Tumour A was not analysed using chromogenic immunohistochemistry.
